# Supplementary material for: Impact of species and antibiotic therapy of enterococcal peritonitis on 30-day mortality in critical care—an analysis of the OUTCOMEREA database
Source: Springer Nature journal article supplement (doi:10.1186/s13054-019-2581-8), 2019-09-06
Supplement: MOESM3 [file 17146860]

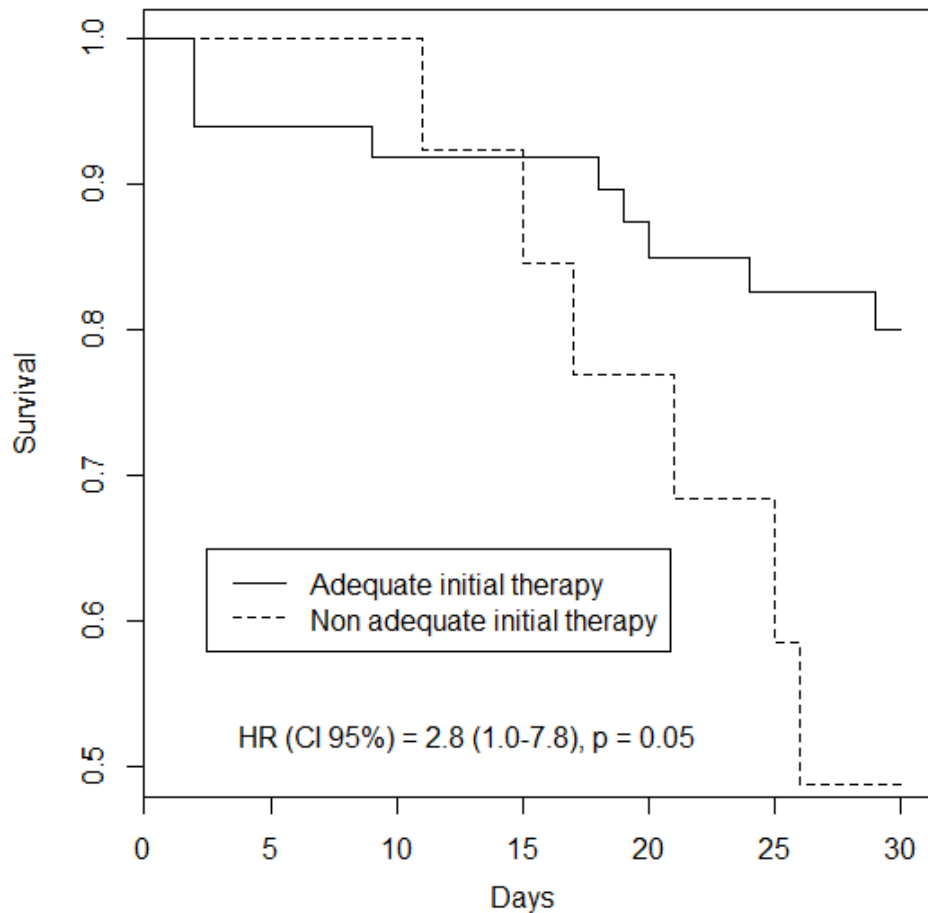

No. of patients at risk

|              |    |    |    |    |    |    |    |
|--------------|----|----|----|----|----|----|----|
| Adequate     | 50 | 45 | 44 | 43 | 37 | 34 | 32 |
| Non adequate | 14 | 13 | 13 | 12 | 9  | 7  | 5  |
